# Supplementary material for: Abo1 is required for the H3K9me2 to H3K9me3 transition in heterochromatin
Source: PubMed Central journal article supplement (PMC7142091; doi:10.1038/s41598-020-63209-y), 2020-04-08

## Supplementary dataset

### **Abo1 is required for the H3K9me2 to H3K9me3 transition in heterochromatin**

Wenbo Dong<sup>1</sup>, Eriko Oya<sup>1</sup>, Yasaman Zahedi<sup>1</sup>, Punit Prasad<sup>1,2</sup>, J Peter Svensson<sup>1</sup>, Andreas Lennartsson<sup>1</sup>, Karl Ekwall<sup>1</sup>, Mickaël Durand-Dubief<sup>1,\*</sup>.

<sup>1</sup>Dept of Biosciences and Nutrition, Karolinska Institutet NEO, 141 83 Huddinge, Sweden

<sup>2</sup>Institute of Life Sciences, NALCO Square, *Bhubaneswar*, 751023 Odhisa, India

\*Corresponding author :

mickael.durand-dubief@ki.se

## Supplementary Table S1

Dong et al.

| Gene name     | Description                                                                    | Score | Std  |
|---------------|--------------------------------------------------------------------------------|-------|------|
| nto1          | histone acetyltransferase complex subunit Nto1 (predicted)                     | -1,08 | 0,35 |
| pof3          | F-box protein Pof3                                                             | -0,90 | 0,03 |
| swd2          | Set1C complex subunit Swd2.1                                                   | -0,80 | 0,27 |
| clr3          | histone deacetylase (class II) Clr3                                            | -0,75 | 0,26 |
| rxt3          | transcriptional regulatory protein Rxt3                                        | -0,73 | 0,03 |
| set1          | histone lysine methyltransferase Set1                                          | -0,71 | 0,12 |
| whi5          | cell cycle transcriptional repressor Whi5 (predicted)                          | -0,61 | 0,15 |
| SPAC57A7.09   | ubiquitin-protein ligase E3, human RNF13 family homolog                        | -0,60 | 0,07 |
| oga1          | Stm1 homolog Oga1                                                              | -0,59 | 0,10 |
| msc1          | multi-copy suppressor of Chk1                                                  | -0,56 | 0,21 |
| SPBC32F12.07c | membrane associated ubiquitin-protein ligase E3, MARCH family (predicted)      | -0,55 | 0,11 |
| rad3          | ATR checkpoint kinase Rad3                                                     | -0,54 | 0,05 |
| vps8          | WD repeat protein Vps8 (predicted)                                             | -0,54 | 0,10 |
| vgl1          | vigilin (predicted)                                                            | -0,53 | 0,05 |
| swi6          | chromodomain protein Swi6                                                      | -0,52 | 0,09 |
| fil1          | transcription factor, zf-GATA type (predicted)                                 | -0,51 | 0,11 |
| fml1          | ATP-dependent 3' to 5' DNA helicase, FANCM ortholog Fml1                       | -0,51 | 0,09 |
| slx4          | structure-specific endonuclease subunit                                        | -0,50 | 0,14 |
| clr2          | chromatin silencing protein Clr2                                               | -0,50 | 0,10 |
| chp2          | chromodomain protein 2                                                         | -0,49 | 0,02 |
| sty1          | MAP kinase Sty1                                                                | -0,49 | 0,09 |
| clr4          | histone H3 methyltransferase Clr4                                              | -0,49 | 0,05 |
| ubp8          | SAGA complex ubiquitin C-terminal hydrolase Ubp8                               | -0,49 | 0,06 |
| reb1          | RNA polymerase I transcription termination factor Reb1                         | -0,49 | 0,10 |
| sea3          | ubiquitin-protein ligase E3, coatamer related complex subunit Sea3 (predicted) | -0,48 | 0,04 |
| prz1          | calcineurin responsive transcription factor Prz1                               | -0,47 | 0,21 |
| cda1          | chitin deacetylase Cda1                                                        | -0,47 | 0,02 |
| atf31         | transcription factor Atf31                                                     | -0,47 | 0,04 |
| xrc4          | XRCC4 nonhomologous end joining factor Xrc4                                    | -0,46 | 0,00 |
| chp1          | chromodomain protein Chp1                                                      | -0,45 | 0,19 |

## Supplementary Table S2

Dong et al.

| Strains | Genotypes                                                                                              | Source     |
|---------|--------------------------------------------------------------------------------------------------------|------------|
| Hu2185  | <i>h+ ade6-M210 ura4-D18 leu1-32</i>                                                                   | R.Allshire |
| Hu2318  | <i>h+ abo1::KanMX ade6-M210 ura4-D18 leu1-32</i>                                                       | Bioneer    |
| Hu2545  | <i>h- abo1::hphMX ade6-M210 ura4-D18 leu1-32</i>                                                       | this study |
| Hu1098  | <i>h- sir2::KanMX ade6-M210 ura4-D18 leu1-32</i>                                                       | Bioneer    |
| FY1862  | <i>h+ ade6-M210 his3-D1 ura4-D18 leu1-32 otr1RSphl::ade6+ his3::Tel(1L) ura4+::Tel(2L)</i>             | R.Allshire |
| Hu2464  | <i>h- rrp6::KanMX ade6-M210 ura4-D18 leu1-32</i>                                                       | Bioneer    |
| Hu3021  | <i>h- smt0 abo1::hphMX ade6-M210 ura4-D18 leu1-32</i>                                                  | this study |
| Hu3022  | <i>h+ clr3::KanMX ade6-M210 ura4-D18 leu1-32</i>                                                       | Bioneer    |
| Hu3023  | <i>h+ clr4::KanMX ade6-M210 ura4-D18 leu1-32</i>                                                       | Bioneer    |
| Hu3024  | <i>h+ swi6::KanMX ade6-M210 ura4-D18 leu1-32</i>                                                       | Bioneer    |
| Hu3026  | <i>h? clr3::KanMX abo1::hphMX ade6-M210 ura4-D18 leu1-32</i>                                           | this study |
| Hu3027  | <i>h? clr4::KanMX abo1::hphMX ade6-M210 ura4-D18 leu1-32</i>                                           | this study |
| Hu3028  | <i>h? swi6::KanMX abo1::hphMX ade6-M210 ura4-D18 leu1-32</i>                                           | this study |
| Hu3030  | <i>h? abo1::hphMX ade6-M210 his3-D1 ura4-D18 leu1-32 otr1RSphl::ade6+ his3::Tel(1L) ura4+::Tel(2L)</i> | this study |
| Hu3031  | <i>h? rrp6::KanMX abo1::hphMX ade6-M210 ura4-D18 leu1-32</i>                                           | this study |
| SPJ390  | <i>mat1Msm0m leu1-32 his2-ura4D/E ade6-M210 otr::ura4+; Flag-clr4</i>                                  | S.Jia      |
| Hu3040  | <i>mat1Msm0m leu1-32 his2-ura4D/E ade6-M210 otr::ura4+; abo1::KanMX; Flag-clr4</i>                     | this study |

## Supplementary Table S3

Dong et al.

| Names                  | Sequences                    |
|------------------------|------------------------------|
| SPAC186.05c_Forward    | 5'-CCAATATGGACGGGCATCCG-3'   |
| SPAC186.05c_Reverse    | 5'-AGGGAACAGAAAAGGGGCAG-3'   |
| SPAC186.08c_Forward    | 5'-ACAGGATTCCCAGCTGAACG-3'   |
| SPAC186.08c_Reverse    | 5'-ACACTTTGAGGATCAAGGCCA-3'  |
| SPAPJ695.01c_Forward   | 5'-GCTAACCGGTCAGTATACCACT-3' |
| SPAPJ695.01c_Reverse   | 5'-TGGGATCCAAGTCGCTGTTT-3'   |
| SPBPB21E7.02c_Forward  | 5'-CGTACGTTGCAAACGATGGA-3'   |
| SPBPB21E7.02c_Reverse  | 5'-GTCGCAAGGCCAATTTCCAG-3'   |
| dhk_Forward            | 5'-ATAGCGCCACACTTTTGAGC-3'   |
| dhk_Reverse            | 5'-TGGGCATCAAAGGAATGTTT-3'   |
| Islands6_ssm4_Forward  | 5'-GACCGCAAGGATGAAACTGG-3'   |
| Islands6_ssm4_Reverse  | 5'-TCCTTGCAAGCAAAGGTCAA-3'   |
| Islands8_mcp5_Forward  | 5'-TAAGGACCGATGCGCTTTCA-3'   |
| Islands8_mcp5_Reverse  | 5'-GACGAGGAATCGAGCAGTCA-3'   |
| Islands9_mei4_Forward  | 5'-ATGTTGCTGCCGAAGTCTCA-3'   |
| Islands9_mei4_Reverse  | 5'-TTAGAAGGGGGAAGAGGGGG-3'   |
| Islands16_mbx2_Forward | 5'-GGCTTGCCCTCCTTTTCTCT-3'   |
| Islands16_mbx2_Reverse | 5'-GTAGGCGGAATAGGTGAGCC-3'   |
| Tlh1_Forward           | 5'-GACCACAACCTTGCGAGAATG-3'  |
| Tlh1_Reverse           | 5'-GCAATAGTCCTTCGGTATTG-3'   |

# Supplementary Figure S1

Dong et al.

## Chromosome I

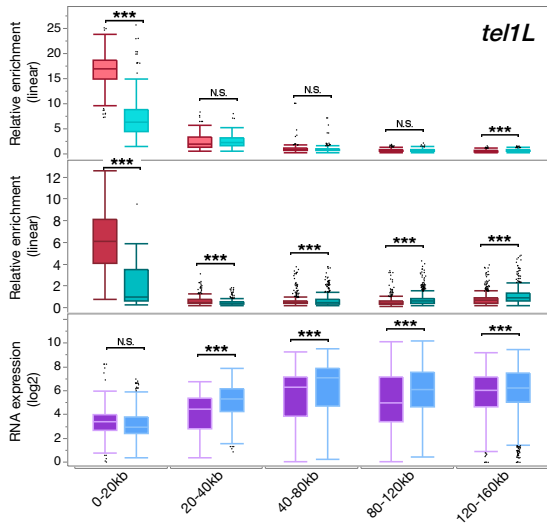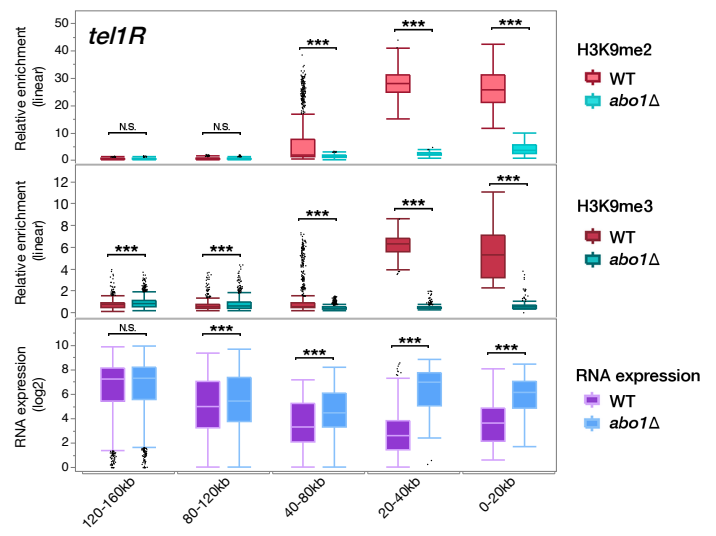

## Chromosome II

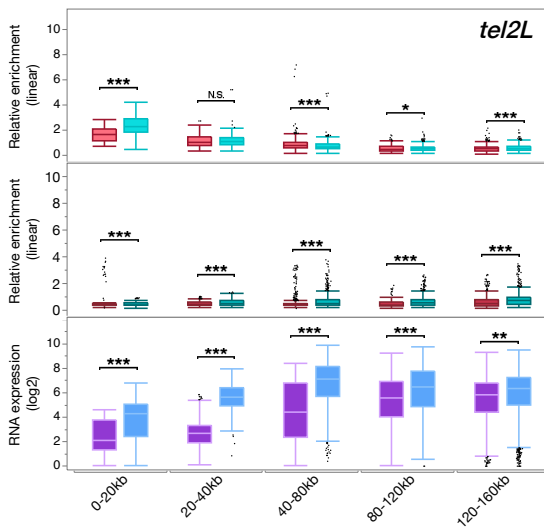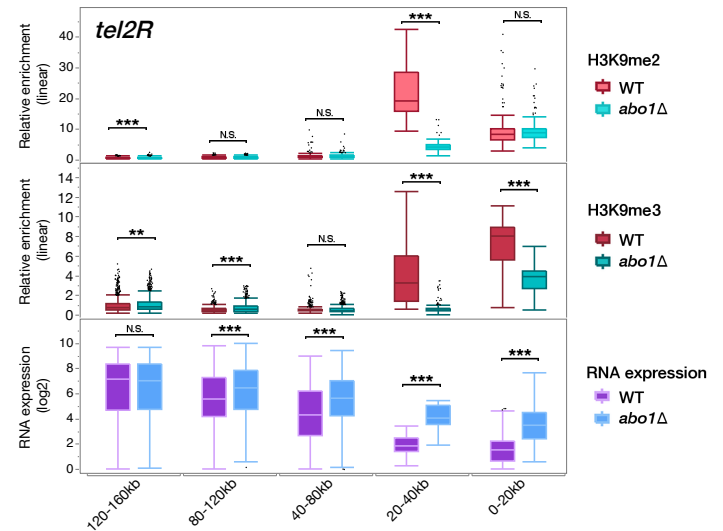

## Chromosome III

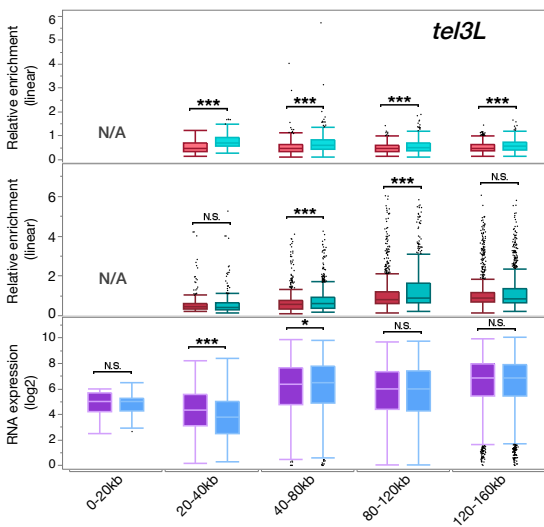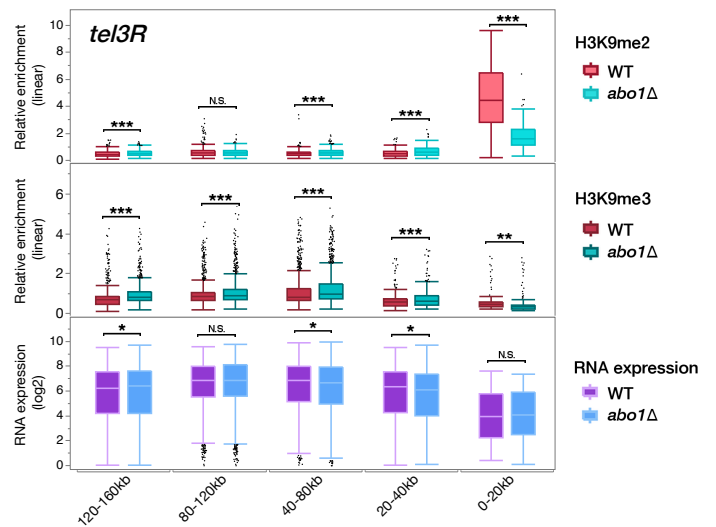

# Supplementary Figure S2

Dong et al.

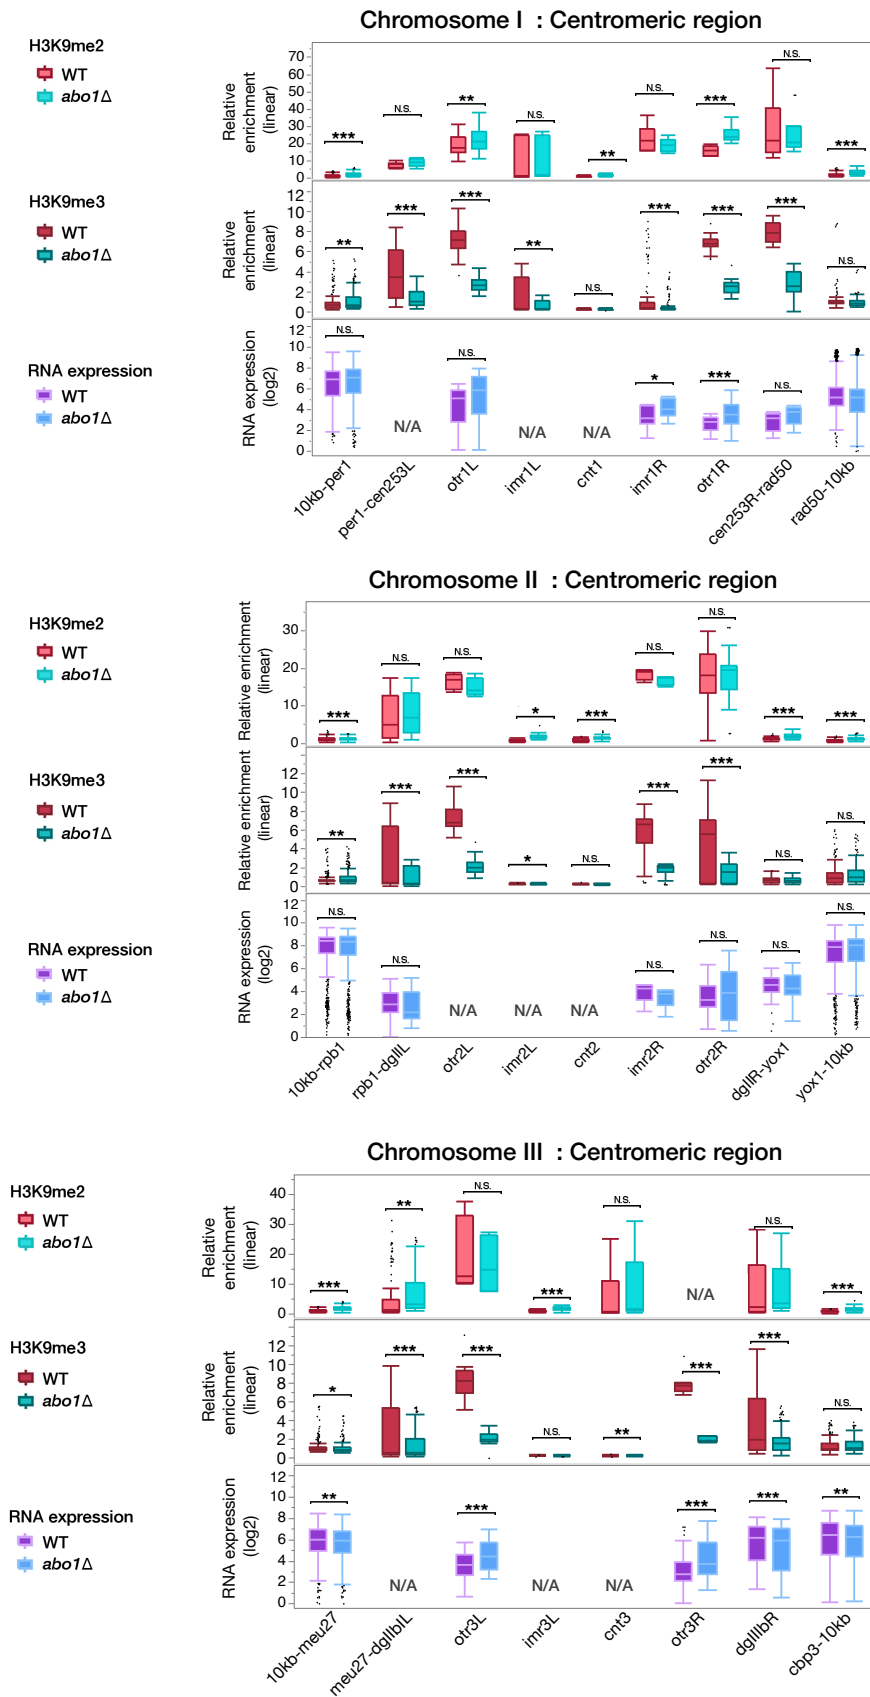

# Supplementary Figure S3

Dong et al.

**A**

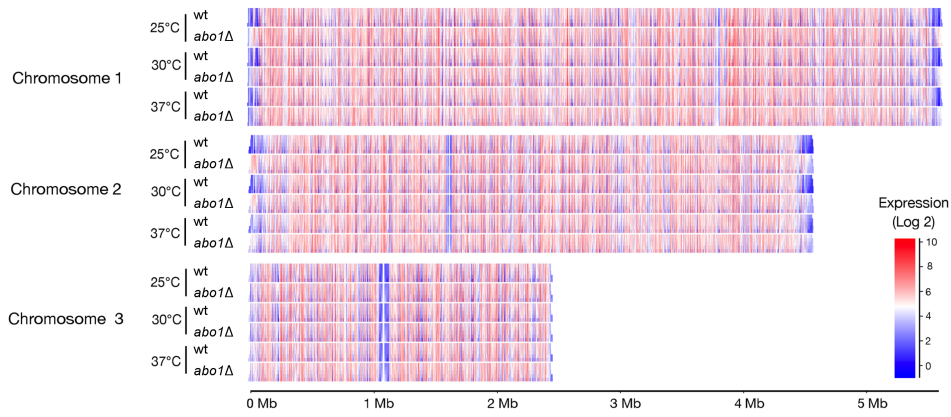

**B**

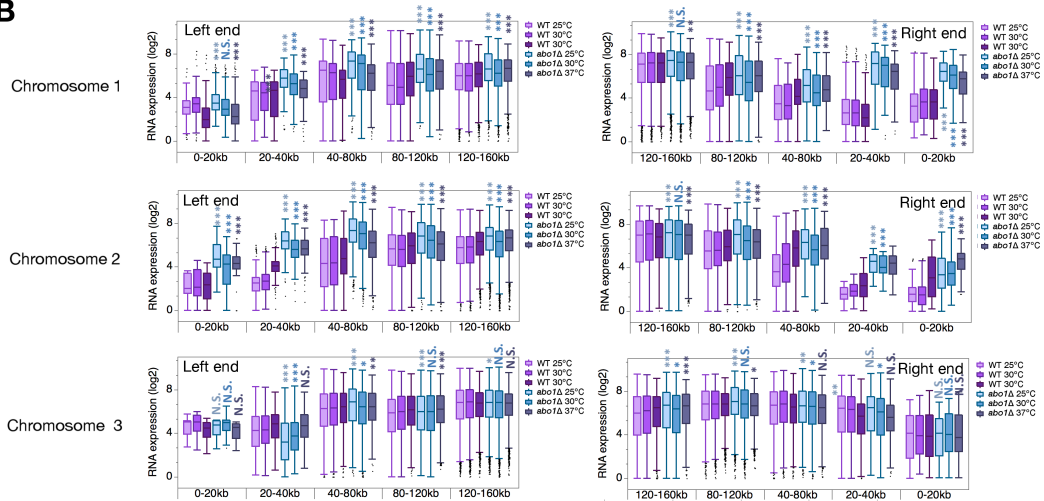

**C**

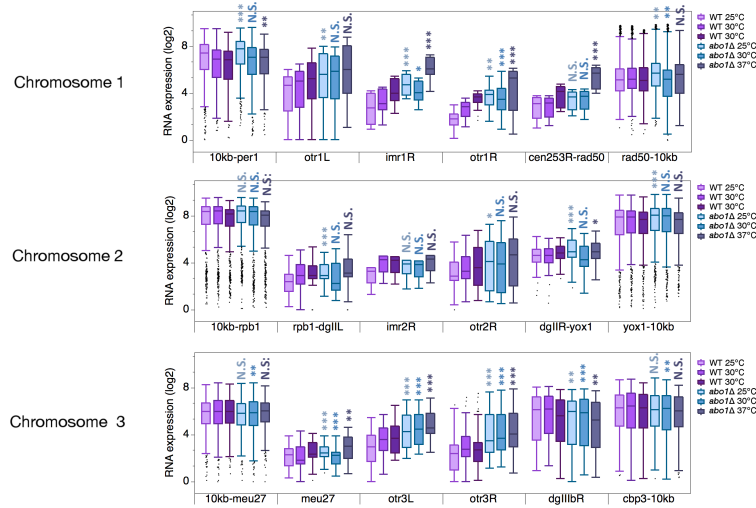

# Supplementary Figure S4

Dong et al.

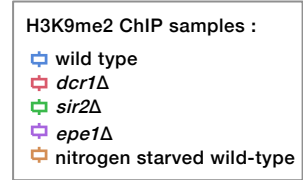

## Chromosome I

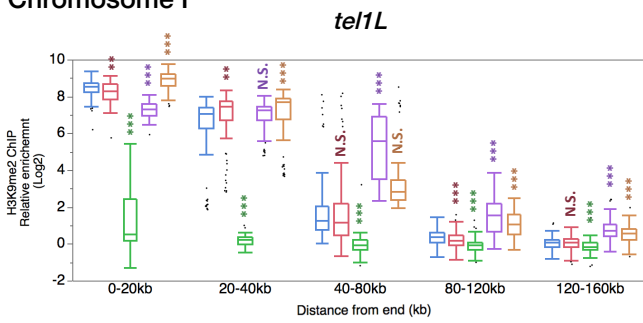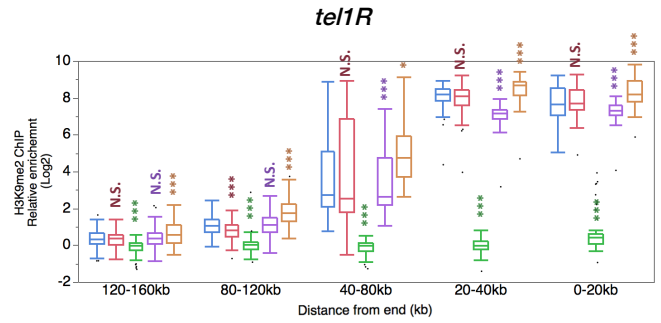

## Chromosome II

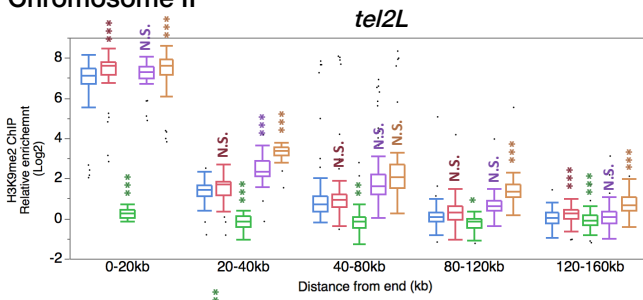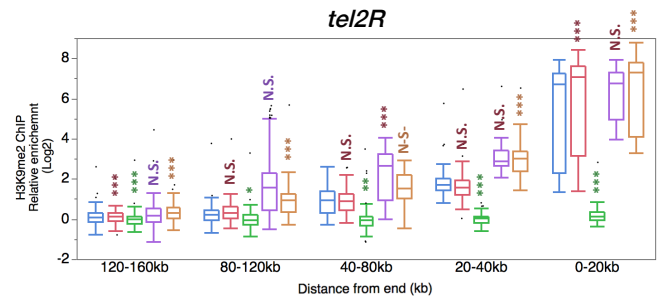

## Chromosome III

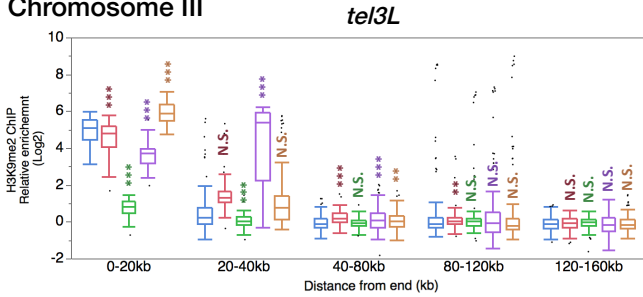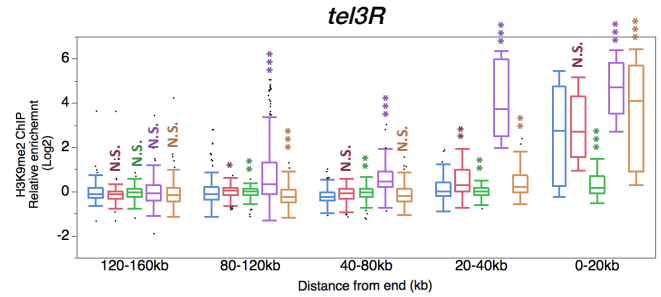



# Supplementary Figure S5

Dong et al.

H3K9me2 ChIP samples :  
 □ wild type (3 exp.)  
 □ *taz1Δ* (1 exp.)

## Chromosome I

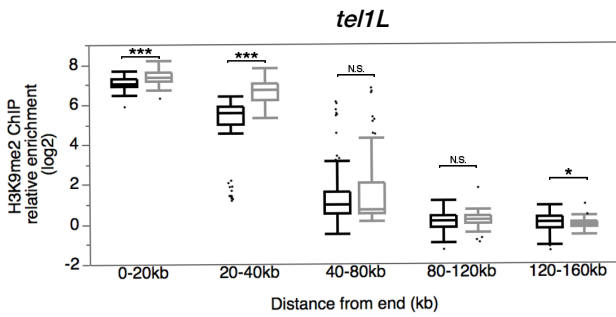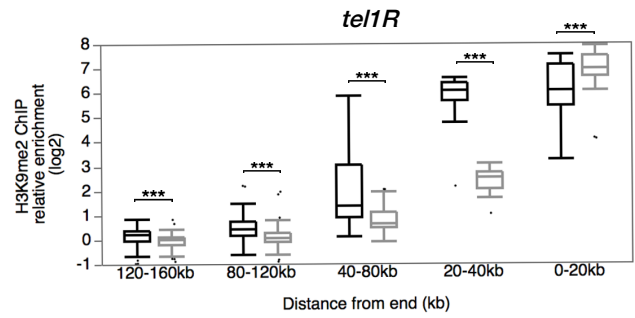

## Chromosome II

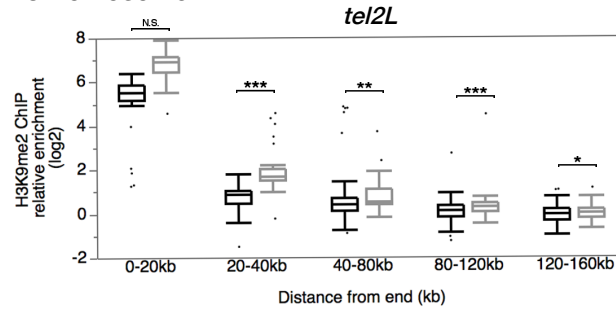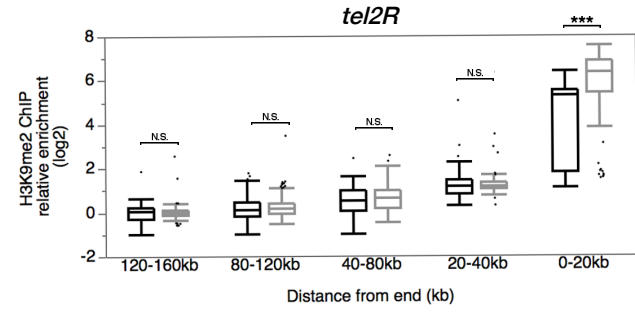

## Chromosome III

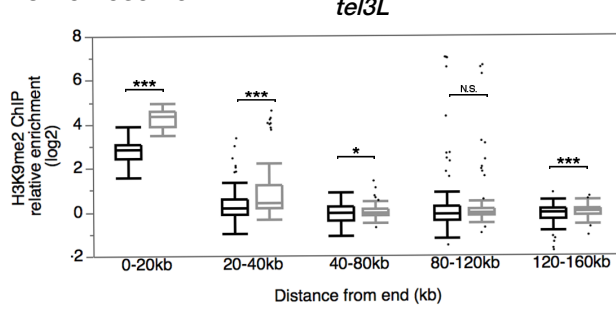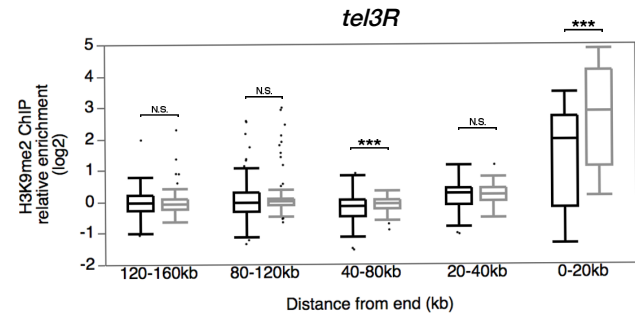

# Supplementary Figure S6

Dong et al.

## Clr4 point mutations

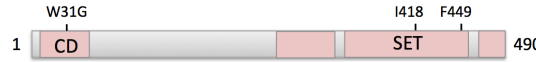

CD : chromo-domain  
SET : SET domain

ChIP samples :

- H3K9me2 wild type
- H3K9me2 *clr4*<sup>W31G</sup>
- H3K9me2 *clr4*<sup>I418P</sup>
- H3K9me2 *clr4*<sup>F449Y</sup>

### Chromosome I

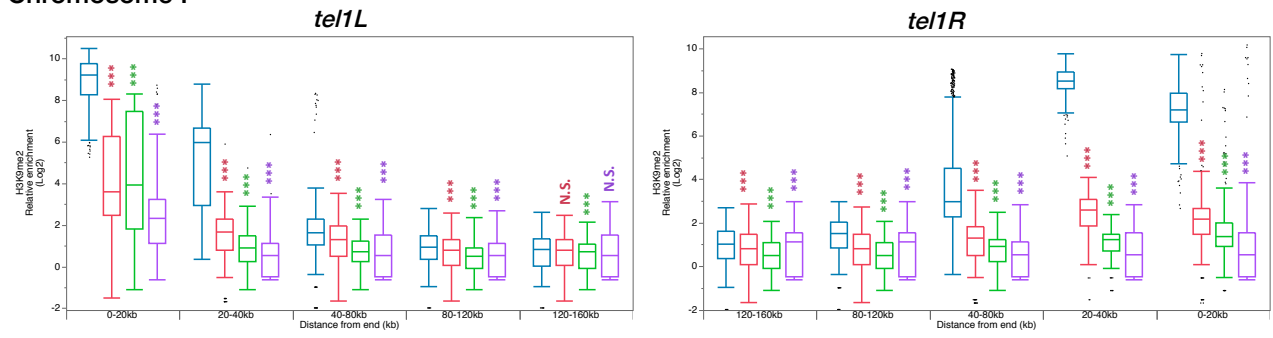

### Chromosome II

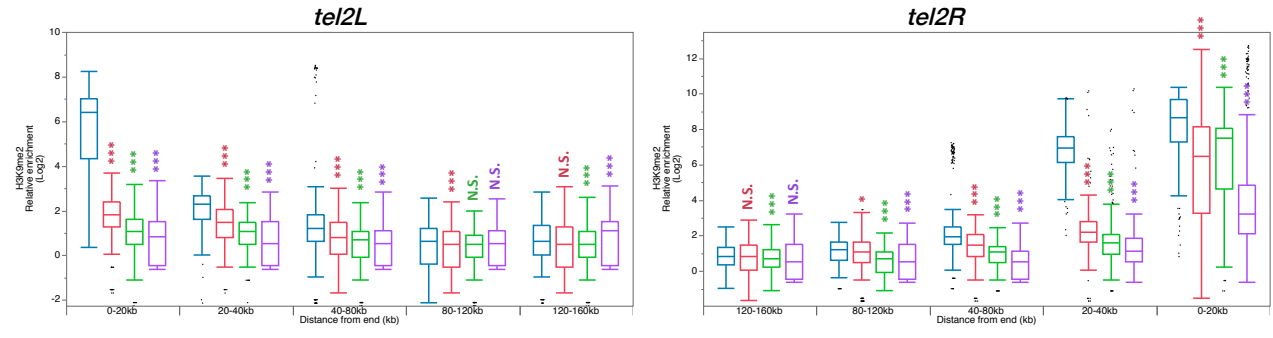

### Chromosome III

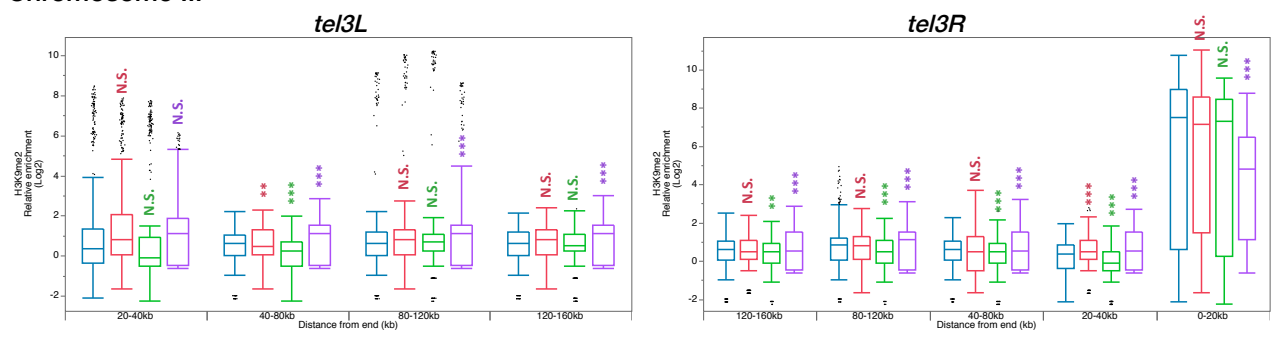

# Supplementary Figure S7

Dong et al.

## Clr4 point mutations

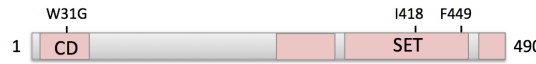

CD : chromo-domain  
SET : SET domain

### Centromere I

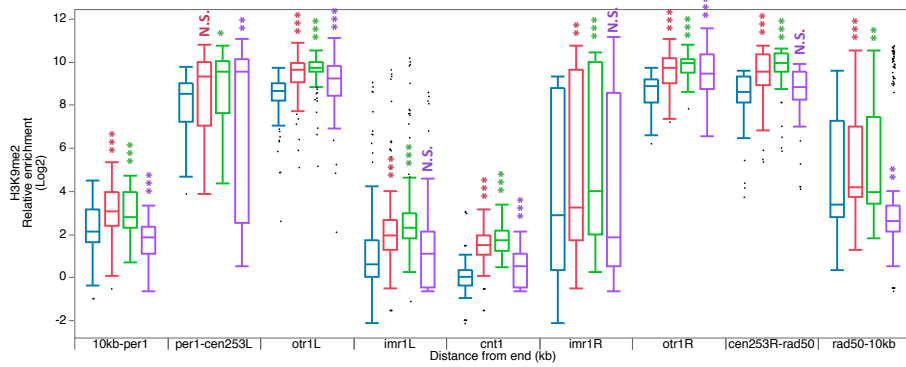

#### ChIP samples :

- H3K9me2 wild type
- H3K9me2 *clr4*<sup>W31G</sup>
- H3K9me2 *clr4*<sup>I418P</sup>
- H3K9me2 *clr4*<sup>F449Y</sup>

### Centromere II

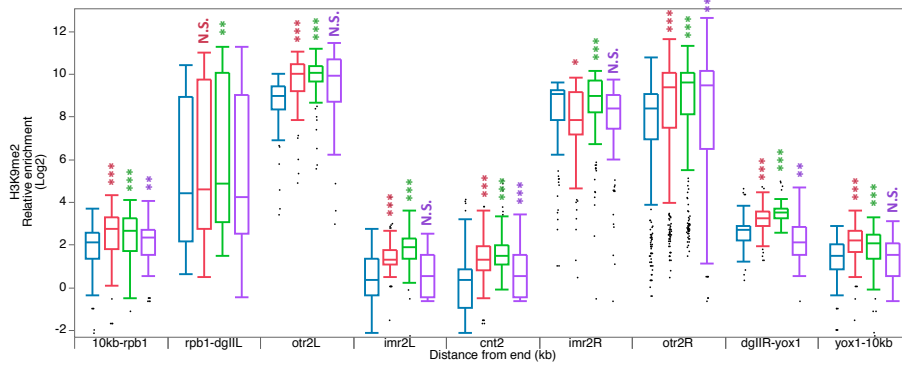

### Centromere III

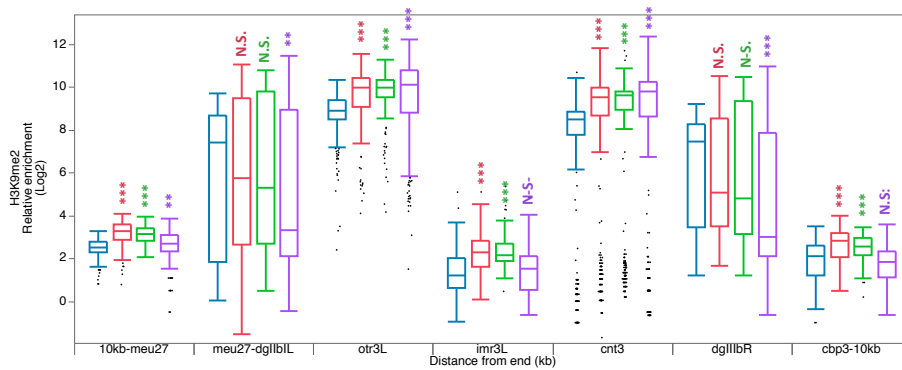

A

| Island name | Island Type | Chr | Start   | End     | Zofall et al., Mol Cell, 2016 |                    | Zofall et al. Science, 2012 |                    |                    |                    | This study                       |                          |                          |
|-------------|-------------|-----|---------|---------|-------------------------------|--------------------|-----------------------------|--------------------|--------------------|--------------------|----------------------------------|--------------------------|--------------------------|
|             |             |     |         |         | H3K9me2 wild-type (log2)      | Ratio <i>taz1Δ</i> | H3K9me2 wild-type (log2)    | Ratio <i>dcr1Δ</i> | Ratio <i>sir2Δ</i> | Ratio <i>epe1Δ</i> | Ratio nitrogen-starved wild-type | H3K9me2 wild-type (log2) | Ratio <i>abo1Δ</i> vs wt |
| Island 1    | DSR         | 1   | 579066  | 581791  | 2,3                           | 3,6                | 3,7                         | 0,4                | 0,1                | 4,1                | 0,1                              | 7,6                      | 0,1                      |
| Island 2    | DSR         | 1   | 2447216 | 2448367 | 1,1                           | 1,7                | 1,2                         | 0,7                | 0,4                | 1,2                | 0,4                              | 1,4                      | 0,7                      |
| Island 4    | DSR         | 1   | 3647841 | 3650229 | 3,1                           | 0,9                | 2,4                         | 0,7                | 0,2                | 1,5                | 0,3                              | 3,0                      | 0,6                      |
| Island 5    | DSR         | 1   | 3727551 | 3729743 | 2,0                           | 1,1                | 2,8                         | 0,2                | 0,2                | 0,6                | 0,8                              | 2,4                      | 0,5                      |
| Island 6    | DSR         | 1   | 4534560 | 4537423 | 3,4                           | 2,1                | 4,1                         | 0,2                | 0,1                | 4,4                | 0,2                              | 6,1                      | 0,1                      |
| Island 8    | DSR         | 2   | 899213  | 902307  | 2,5                           | 1,5                | 2,5                         | 0,5                | 0,2                | 11,9               | 0,2                              | 1,8                      | 0,5                      |
| Island 9    | DSR         | 2   | 1473004 | 1476767 | 3,5                           | 2,0                | 4,7                         | 0,2                | 0,1                | 1,4                | 0,1                              | 7,3                      | 0,05                     |
| Island 16   | DSR         | 2   | 3628602 | 3630143 | 1,6                           | 1,4                | 1,8                         | 0,8                | 0,3                | 2,1                | 0,3                              | 1,4                      | 0,6                      |
| Island 17   | DSR         | 2   | 3641573 | 3642435 | 1,8                           | 1,4                | 1,8                         | 1,0                | 0,3                | 1,4                | 0,5                              | 0,9                      | 1,0                      |
| Island 20   | DSR         | 3   | 2368972 | 2371127 | 1,7                           | 1,5                | 2,0                         | 0,3                | 0,3                | 5,9                | 0,2                              | 1,5                      | 0,7                      |
| Island 3    | non-DSR     | 1   | 2522570 | 2523842 | 2,0                           | 0,2                | 1,8                         | 1,0                | 0,3                | 4,8                | 0,4                              | 1,0                      | 2,6                      |
| Island 13   | non-DSR     | 2   | 1870135 | 1871228 | 1,5                           | 0,3                | 1,6                         | 0,9                | 0,3                | 1,8                | 0,3                              | 1,2                      | 1,0                      |
| Island 14   | non-DSR     | 2   | 2199839 | 2202230 | 3,0                           | 0,1                | 2,2                         | 1,7                | 0,2                | 1,9                | 0,4                              | 0,9                      | 158                      |
| Island 15   | non-DSR     | 2   | 2339483 | 2342596 | 2,1                           | 0,3                | 2,3                         | 0,8                | 0,3                | 1,1                | 0,6                              | 5,0                      | 6,3                      |

B

| Island name | Island Type | H3K9me2 ChIP      |                                         |                                          |                                          | H3K9me3 ChIP      |                                         |                                          |                                          |
|-------------|-------------|-------------------|-----------------------------------------|------------------------------------------|------------------------------------------|-------------------|-----------------------------------------|------------------------------------------|------------------------------------------|
|             |             | H3K9me2 WT (log2) | Ratio <i>clr4</i> <sup>W31G</sup> vs WT | Ratio <i>clr4</i> <sup>I418P</sup> vs WT | Ratio <i>clr4</i> <sup>F449Y</sup> vs WT | H3K9me3 WT (log2) | Ratio <i>clr4</i> <sup>W31G</sup> vs WT | Ratio <i>clr4</i> <sup>I418P</sup> vs WT | Ratio <i>clr4</i> <sup>F449Y</sup> vs WT |
| Island 1    | DSR         | 4,8               | 0,2                                     | 0,1                                      | 0,1                                      | 3,0               | 0,6                                     | 0,6                                      | 0,4                                      |
| Island 2    | DSR         | 1,8               | 0,9                                     | 0,4                                      | 0,4                                      | 1,0               | 1,0                                     | 1,4                                      | 1,7                                      |
| Island 4    | DSR         | 2,4               | 0,8                                     | 0,5                                      | 0,5                                      | 3,3               | 0,4                                     | 1,5                                      | 1,1                                      |
| Island 5    | DSR         | 3,7               | 1,1                                     | 0,4                                      | 0,2                                      | 2,7               | 1,2                                     | 0,9                                      | 0,3                                      |
| Island 6    | DSR         | 4,9               | 0,1                                     | 0,0                                      | 0,0                                      | 3,1               | 0,1                                     | 0,7                                      | 0,5                                      |
| Island 8    | DSR         | 3,3               | 0,4                                     | 0,2                                      | 0,2                                      | 2,3               | 0,1                                     | 1,4                                      | 1,0                                      |
| Island 9    | DSR         | 5,4               | 0,3                                     | 0,1                                      | 0,1                                      | 3,4               | 0,1                                     | 0,7                                      | 0,5                                      |
| Island 16   | DSR         | 2,1               | 0,8                                     | 0,2                                      | 0,4                                      | 1,0               | 1,0                                     | 1,0                                      | 0,9                                      |
| Island 17   | DSR         | 1,3               | 0,9                                     | 0,4                                      | 0,6                                      | 1,6               | 0,3                                     | 1,4                                      | 1,0                                      |
| Island 20   | DSR         | 3,2               | 0,3                                     | 0,1                                      | 0,2                                      | 2,7               | 0,2                                     | 1,2                                      | 1,1                                      |
| Island 3    | non-DSR     | 1,5               | 2,1                                     | 0,8                                      | 0,6                                      | 0,6               | 0,7                                     | 0,9                                      | 0,6                                      |
| Island 13   | non-DSR     | 2,8               | 1,1                                     | 0,3                                      | 0,2                                      | 0,5               | 0,7                                     | 1,3                                      | 0,4                                      |
| Island 14   | non-DSR     | 3,2               | 0,8                                     | 0,2                                      | 0,2                                      | 2,2               | 0,2                                     | 0,6                                      | 0,2                                      |
| Island 15   | non-DSR     | 4,8               | 2,9                                     | 1,8                                      | 0,1                                      | 4,1               | 0,1                                     | 0,2                                      | 0,1                                      |

# Supplementary Figure S9

A

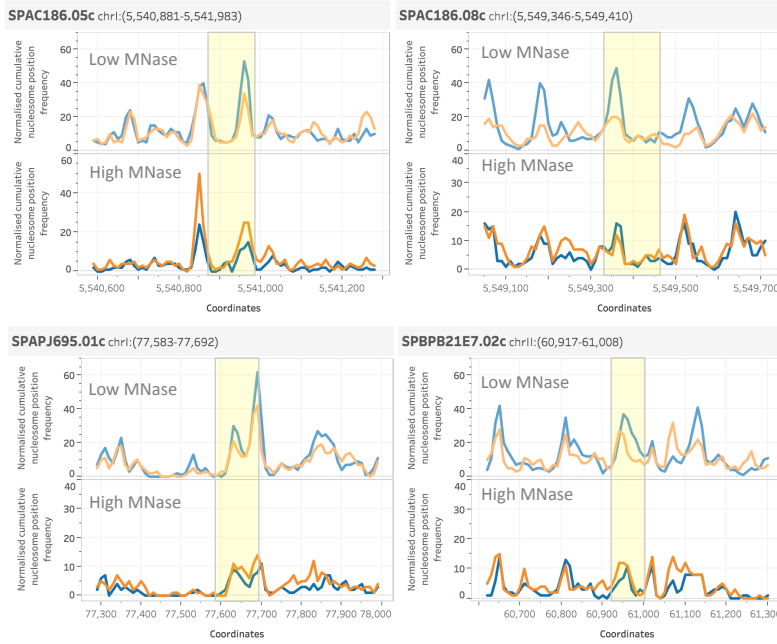

Legends :

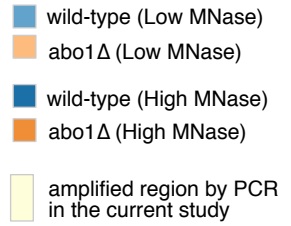

B

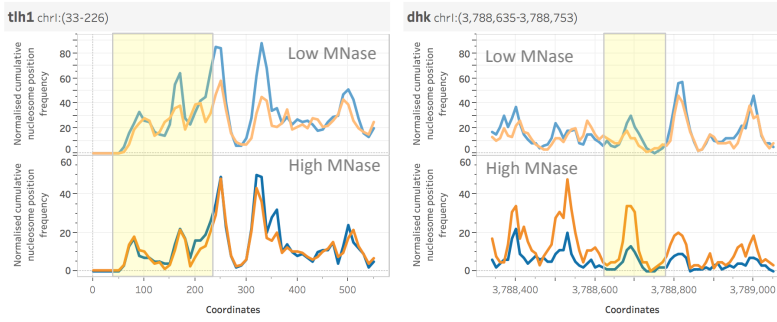

C

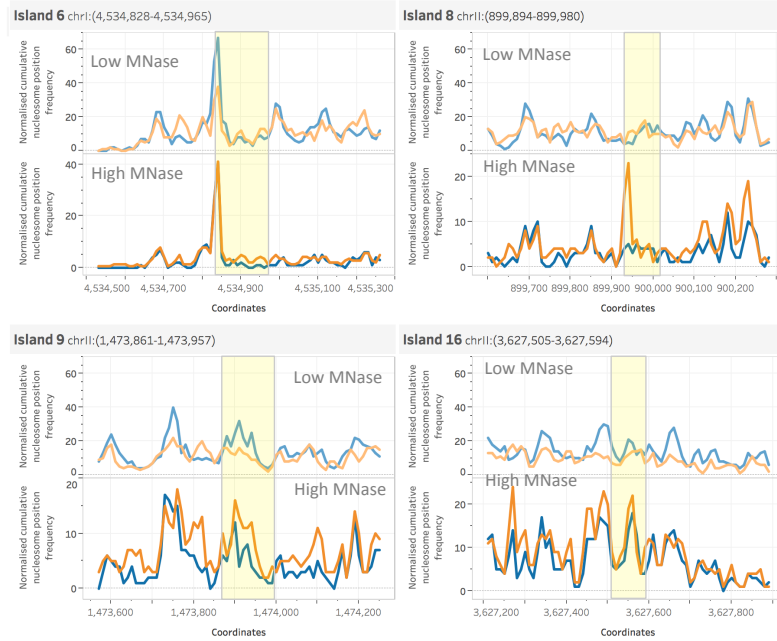

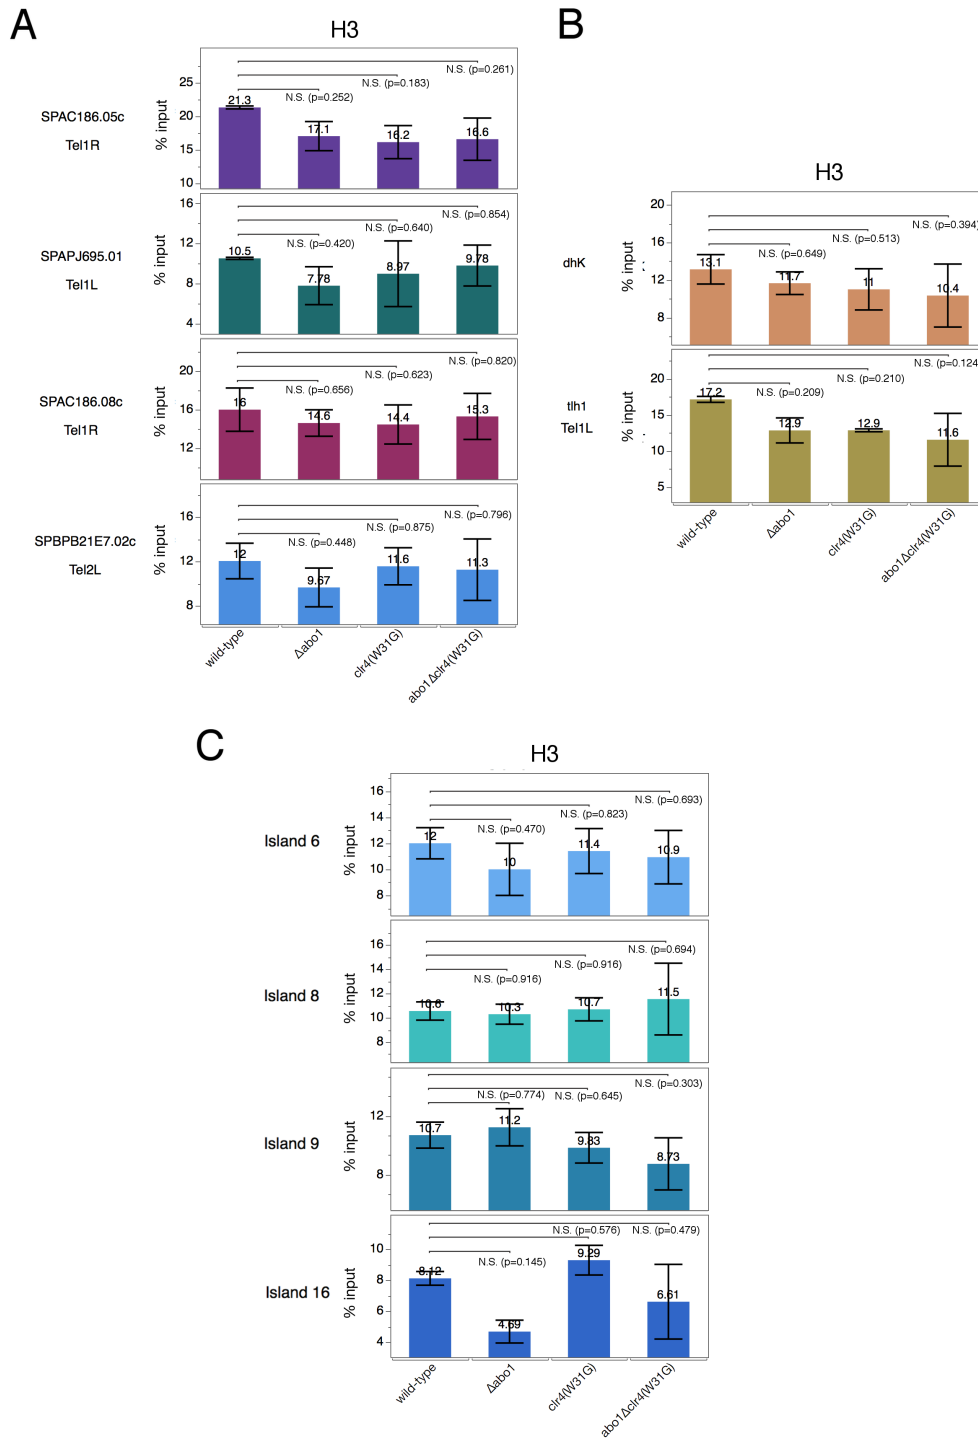

## Supplementary Figure S11 (1/2)

| Number of Unique Peptides |          | Top Identified Proteins identified only in Abo1-TAP-TAG |              |                                                                     |
|---------------------------|----------|---------------------------------------------------------|--------------|---------------------------------------------------------------------|
| Mock                      | SPAC31G5 | Gene ID                                                 | Gene name    | Description                                                         |
| 2                         | 22       | SPBC2F12.05c                                            | osh2         | sterol intermembrane transfer protein Osh2 (predicted)              |
| 0                         | 22       | SPBC31E1.06                                             | bms1         | GTP binding protein Bms1 (predicted)                                |
| 3                         | 22       | SPAC19D5.04                                             | ptr1         | HECT-type ubiquitin-protein ligase E3 Ptr1                          |
| 0                         | 17       | SPCC16C4.08c                                            | skb15        | p21 activated protein kinase inhibitor Skb15                        |
| 0                         | 15       | SPCC645.14c                                             | sti1         | chaperone activator Sti1 (predicted)                                |
| 0                         | 14       | SPBC11C11.02                                            | imp2         | F-BAR domain protein Imp2                                           |
| 0                         | 14       | SPBC8D2.10c                                             | rmt3         | type I ribosomal protein arginine N-methyltransferase Rmt3          |
| 0                         | 13       | <b>SPAC31G5.19</b>                                      | <b>abo1</b>  | <b>ATPase with bromodomain protein</b>                              |
| 2                         | 13       | SPCC18B5.01c                                            | bfr1         | plasma membrane brefeldin A efflux transporter Bfr1                 |
| 2                         | 13       | <b>SPAC23G3.01</b>                                      | rbp2         | RNA polymerase II complex subunit Rbp2                              |
| 0                         | 13       | SPAC4A8.12c                                             | sds22        | protein phosphatase regulatory subunit Sds22                        |
| 0                         | 13       | SPCC11E10.07c                                           | tif221       | translation initiation factor eIF2B alpha subunit                   |
| 0                         | 12       | SPAC343.14c                                             | tif222       | translation initiation factor eIF2B beta subunit                    |
| 0                         | 11       | SPAC20G8.06                                             | not1         | CCR4-Not complex scaffold subunit Not1                              |
| 2                         | 11       | <b>SPBC609.05</b>                                       | <b>pob3</b>  | <b>histone H2A-H2B chaperone, FACT complex subunit Pob3</b>         |
| 0                         | 11       | <b>SPBC16D10.07c</b>                                    | <b>sir2</b>  | <b>Sirtuin family histone deacetylase Sir2</b>                      |
| 2                         | 11       | SPBC17G9.09                                             | tif213       | translation initiation factor eIF2 gamma subunit                    |
| 2                         | 10       | SPBC651.11c                                             | apm3         | AP-3 adaptor complex subunit Apm3 (predicted)                       |
| 2                         | 10       | <b>SPBC17G9.02c</b>                                     | <b>cdc73</b> | <b>RNA polymerase II accessory factor, Cdc73 family (predicted)</b> |
| 0                         | 10       | SPAC1B3.05                                              | not3         | CCR4-Not complex NOT box subunit Not3/5                             |
| 0                         | 10       | SPBC428.19c                                             | utp15        | U3 snoRNP protein Utp15 (predicted)                                 |
| 0                         | 10       | SPAC890.04c                                             | ytm1         | ribosome biogenesis protein Ytm1 (predicted)                        |
| 0                         | 9        | SPBC3F6.01c                                             | SPBC3F6.01c  | serine/threonine protein phosphatase (predicted)                    |
| 0                         | 9        | SPAC4F8.12c                                             | spp42        | U5 snRNP complex subunit Spp42                                      |
| 0                         | 8        | SPAC1093.05                                             | hca4         | ATP-dependent RNA helicase Hca4 (predicted)                         |
| 0                         | 8        | SPAC6B12.15                                             | cpc2         | G protein beta subunit-like protein Rkp1                            |
| 0                         | 7        | SPAC30C2.04                                             | asc1         | cofactor for methionyl- and glutamyl-tRNA synthetases (predicted)   |
| 0                         | 7        | SPAC694.02                                              | SPAC694.02   | DEAD/DEAH box helicase                                              |
| 0                         | 7        | SPAC23C11.11                                            | cka1         | serine/threonine protein kinase Cka1                                |
| 1                         | 7        | SPAC222.07c                                             | hri2         | eIF2 alpha kinase Hri2                                              |
| 0                         | 7        | SPAC664.05                                              | rpl13        | 60S ribosomal protein L13                                           |
| 0                         | 7        | SPBC16G5.14c                                            | rps3         | 40S ribosomal protein S3                                            |
| 0                         | 7        | <b>SPAPB8E5.09</b>                                      | <b>rvb1</b>  | <b>AAA family ATPase Rvb1</b>                                       |
| 1                         | 7        | SPCC188.06c                                             | srp54        | signal recognition particle subunit Srp54                           |
| 0                         | 7        | SPAC22H12.02                                            | tfg3         | transcription factor TFIIIF complex subunit Tfg3                    |
| 0                         | 7        | SPCC24B10.21                                            | tpi1         | triosephosphate isomerase                                           |
| 1                         | 7        | SPBC1778.01c                                            | zuo1         | zuotin (predicted)                                                  |
| 0                         | 7        | SPBC215.12                                              | SPBC215.12   | GTPase Cwf10 (predicted)                                            |
| 0                         | 6        | <b>SPAC16A10.02</b>                                     | sub1         | <b>transcription coactivator PC4</b>                                |
| 0                         | 6        | SPAC977.14c                                             | SPAC977.14c  | aldo-keto reductase family protein                                  |
| 0                         | 6        | <b>SPBC13G1.08c</b>                                     | ash2         | <b>Ash2-trithorax family protein</b>                                |
| 0                         | 6        | SPBC3D6.02                                              | but2         | But2 family protein But2                                            |
| 0                         | 6        | SPBC776.02c                                             | dis2         | serine/threonine protein phosphatase PP1                            |
| 0                         | 6        | SPBC16E9.05                                             | erg6         | delta-sterol C-methyltransferase Erg6 (predicted)                   |
| 0                         | 6        | SPAC19B12.05c                                           | fcp1         | CTD phosphatase Fcp1                                                |
| 1                         | 6        | SPBC36B7.09                                             | gcn2         | eIF2 alpha kinase Gcn2                                              |
| 0                         | 6        | SPCC1739.12                                             | ppe1         | serine/threonine protein phosphatase Ppe1                           |
| 0                         | 6        | SPAC521.05                                              | rps802       | 40S ribosomal protein S8                                            |
| 0                         | 6        | SPAC823.08c                                             | rrp3         | ATP-dependent RNA helicase Rrp3 (predicted)                         |
| 0                         | 6        | SPAC57A10.10c                                           | sla1         | La-motif domain-containing protein                                  |
| 0                         | 6        | SPAC16E8.15                                             | tif45        | translation initiation factor eIF4E, 4F complex subunit             |
| 0                         | 6        | SPAC23H4.15                                             | tsr1         | ribosome biogenesis protein Tsr1 (predicted)                        |
| 0                         | 5        | SPAC12G12.06c                                           | rcl1         | RNA 3'-terminal phosphate cyclase (predicted)                       |
| 0                         | 5        | SPBC3D6.12                                              | dip2         | U3 snoRNA associated protein Dip2 (predicted)                       |
| 1                         | 5        | SPAC458.02c                                             | SPAC458.02c  | mRNP complex (predicted)                                            |

## Supplementary Figure S11 (2/2)

| Number of Unique Peptides |          | Identified Proteins identified in Abo1-TAP-TAG |              |                                                                       |
|---------------------------|----------|------------------------------------------------|--------------|-----------------------------------------------------------------------|
| Mock                      | SPAC31G5 | Gene ID                                        | Gene name    | Description                                                           |
| 0                         | 5        | SPCC31H12.08c                                  | ccr4         | CCR4-Not complex subunit Ccr4 (predicted)                             |
| 0                         | 5        | SPCC1223.07c                                   | drs1         | cytoplasmic aspartate-tRNA ligase Drs1 (predicted)                    |
| 0                         | 5        | SPCC622.09                                     | htb1         | histone H2B alpha Htb1                                                |
| 0                         | 5        | SPBC19G7.16                                    | iws1         | transcription elongation factor complex subunit Iws1 (predicted)      |
| 0                         | 5        | SPAC3F10.17                                    | ltv1         | ribosome biogenesis protein Ltv1 (predicted)                          |
| 0                         | 5        | SPCC736.12c                                    | mml1         | YTH family protein Mml1                                               |
| 0                         | 5        | SPAC20G8.09c                                   | nat10        | N-acetyltransferase Nat10 (predicted)                                 |
| 0                         | 5        | SPBC14C8.14c                                   | pol5         | DNA polymerase phi                                                    |
| 0                         | 5        | SPAC29A4.08c                                   | prp19        | ubiquitin-protein ligase E4                                           |
| 0                         | 5        | SPAC57A7.08                                    | pzh1         | serine/threonine protein phosphatase Pzh1                             |
| 0                         | 5        | SPAC23C4.15                                    | rpb5         | DNA-directed RNA polymerase I, II and III subunit Rpb5                |
| 1                         | 5        | SPBC11C11.08                                   | srp1         | Srp1                                                                  |
| 0                         | 5        | SPCC576.13                                     | swc5         | Swr1 complex subunit Swc5                                             |
| 0                         | 5        | SPAC32A11.04c                                  | tif212       | translation initiation factor eIF2 beta subunit (predicted)           |
| 0                         | 5        | SPBC23E6.04c                                   | utp10        | U3 snoRNP-associated protein Utp10 (predicted)                        |
| 0                         | 4        | SPBC29A10.12                                   | oxs1         | HMG-box variant                                                       |
| 0                         | 4        | SPBC36B7.08c                                   | ccp1         | histone chaperone, CENP-A nucleosome disassembly                      |
| 0                         | 4        | SPBC25B2.10                                    | SPBC25B2.10  | Usp (universal stress protein) family protein                         |
| 0                         | 4        | SPCC550.15c                                    | rei1         | ribosome biogenesis protein (predicted)                               |
| 0                         | 4        | SPBC1289.11                                    | spf38        | splicing factor Spf38                                                 |
| 0                         | 4        | SPBC31F10.11c                                  | cw4          | complexed with Cdc5 protein Cwf4                                      |
| 0                         | 4        | SPAC22A12.11                                   | dak1         | dihydroxyacetone kinase Dak1                                          |
| 0                         | 4        | SPBP8B7.16c                                    | dbp2         | ATP-dependent RNA helicase Dbp2                                       |
| 0                         | 4        | SPBC28E12.05                                   | esf2         | U3 snoRNP-associated protein Esf2 (predicted)                         |
| 0                         | 4        | SPAC1834.03c                                   | SPAC1834.03c | histone H4 h4.2                                                       |
| 0                         | 4        | SPAC16E8.06c                                   | nop12        | RNA-binding protein Nop12                                             |
| 0                         | 4        | SPBC215.07c                                    | pdp2         | PWWP domain protein                                                   |
| 0                         | 4        | SPBC28F2.03                                    | ppi1         | cyclophilin family peptidyl-prolyl cis-trans isomerase Cyp2           |
| 0                         | 4        | SPBC19F5.05c                                   | ppp1         | pescadillo-family BRCT domain protein                                 |
| 0                         | 4        | SPBC6B1.10                                     | prp17        | splicing factor Prp17                                                 |
| 0                         | 4        | SPBC23G7.08c                                   | rga7         | Rho-type GTPase activating protein Rga7                               |
| 0                         | 4        | SPAC26A3.07c                                   | rpl1101      | 60S ribosomal protein L11                                             |
| 0                         | 4        | SPAC1805.13                                    | rpl14        | 60S ribosomal protein L14 (predicted)                                 |
| 0                         | 4        | SPAC589.10c                                    | ubi5         | ribosomal-ubiquitin fusion protein Ubi5                               |
| 0                         | 4        | SPAC10F6.06                                    | vip1         | RNA-binding protein Vip1                                              |
| 0                         | 3        | SPBC3B8.09                                     | utp3         | U3 snoRNP-associated protein Utp3 (predicted)                         |
| 0                         | 3        | SPAC1565.05                                    | utp8         | sequence orphan                                                       |
| 0                         | 3        | SPCC1672.07                                    | utp21        | U3 snoRNP-associated protein Utp21 (predicted)                        |
| 0                         | 3        | SPBC713.04c                                    | pwp2         | U3 snoRNP-associated protein Utp1                                     |
| 0                         | 3        | SPBC16E9.02c                                   | SPBC16E9.02c | CUE domain protein                                                    |
| 0                         | 3        | SPBC9B6.10                                     | cdc37        | Hsp90 co-chaperone Cdc37                                              |
| 0                         | 3        | SPAC644.12                                     | cdc5         | cell division control protein Cdc5                                    |
| 0                         | 3        | SPAC8C9.03                                     | cgs1         | cAMP-dependent protein kinase regulatory subunit Cgs1                 |
| 0                         | 3        | SPBC211.02c                                    | cwf3         | complexed with Cdc5 protein Cwf3                                      |
| 0                         | 3        | SPAC29A4.20                                    | elp3         | elongator complex, histone acetyltransferase subunit Elp3 (predicted) |
| 0                         | 3        | SPAC17A5.14                                    | exo2         | exonuclease II Exo2                                                   |
| 0                         | 3        | SPAC664.01c                                    | swi6         | chromodomain protein Swi6                                             |
| 0                         | 3        | SPAC4F8.07c                                    | hvk2         | Hexokinase 2                                                          |
| 0                         | 3        | SPBC1D7.04                                     | mlo3         | RNA annealing factor Mlo3                                             |
| 0                         | 3        | SPBC56F2.02                                    | rpl1901      | 60S ribosomal protein L19                                             |
| 0                         | 3        | SPBC106.18                                     | rpl2501      | 60S ribosomal protein L25 (predicted)                                 |
| 0                         | 3        | SPCC613.05c                                    | rpl35        | 60S ribosomal protein L35                                             |
| 0                         | 3        | SPBC11C11.09c                                  | rpl502       | 60S ribosomal protein L5                                              |
| 0                         | 3        | SPBC18H10.12c                                  | rpl701       | 60S ribosomal protein L7                                              |
| 0                         | 3        | SPAPJ698.02c                                   | rps002       | 40S ribosomal protein S0B                                             |
| 0                         | 3        | SPAC31G5.17c                                   | rps1001      | 40S ribosomal protein S10                                             |
| 0                         | 3        | SPBC21C3.13                                    | rps1901      | ribosomal protein S16 homolog                                         |
| 0                         | 3        | SPBC17G9.07                                    | rps2402      | 40S ribosomal protein S24                                             |
| 0                         | 3        | SPCC31H12.05c                                  | sds21        | serine/threonine protein phosphatase Sds21                            |
| 0                         | 3        | SPAC23H3.05c                                   | swd1         | Set1C complex subunit Swd1                                            |
| 0                         | 3        | SPAC2G11.15c                                   | tgs1         | RNA methyltransferase Tgs1 (predicted)                                |
| 0                         | 3        | SPAC9E9.13                                     | wos2         | p23 chaperone protein wos2                                            |



# Supplementary Figure S12

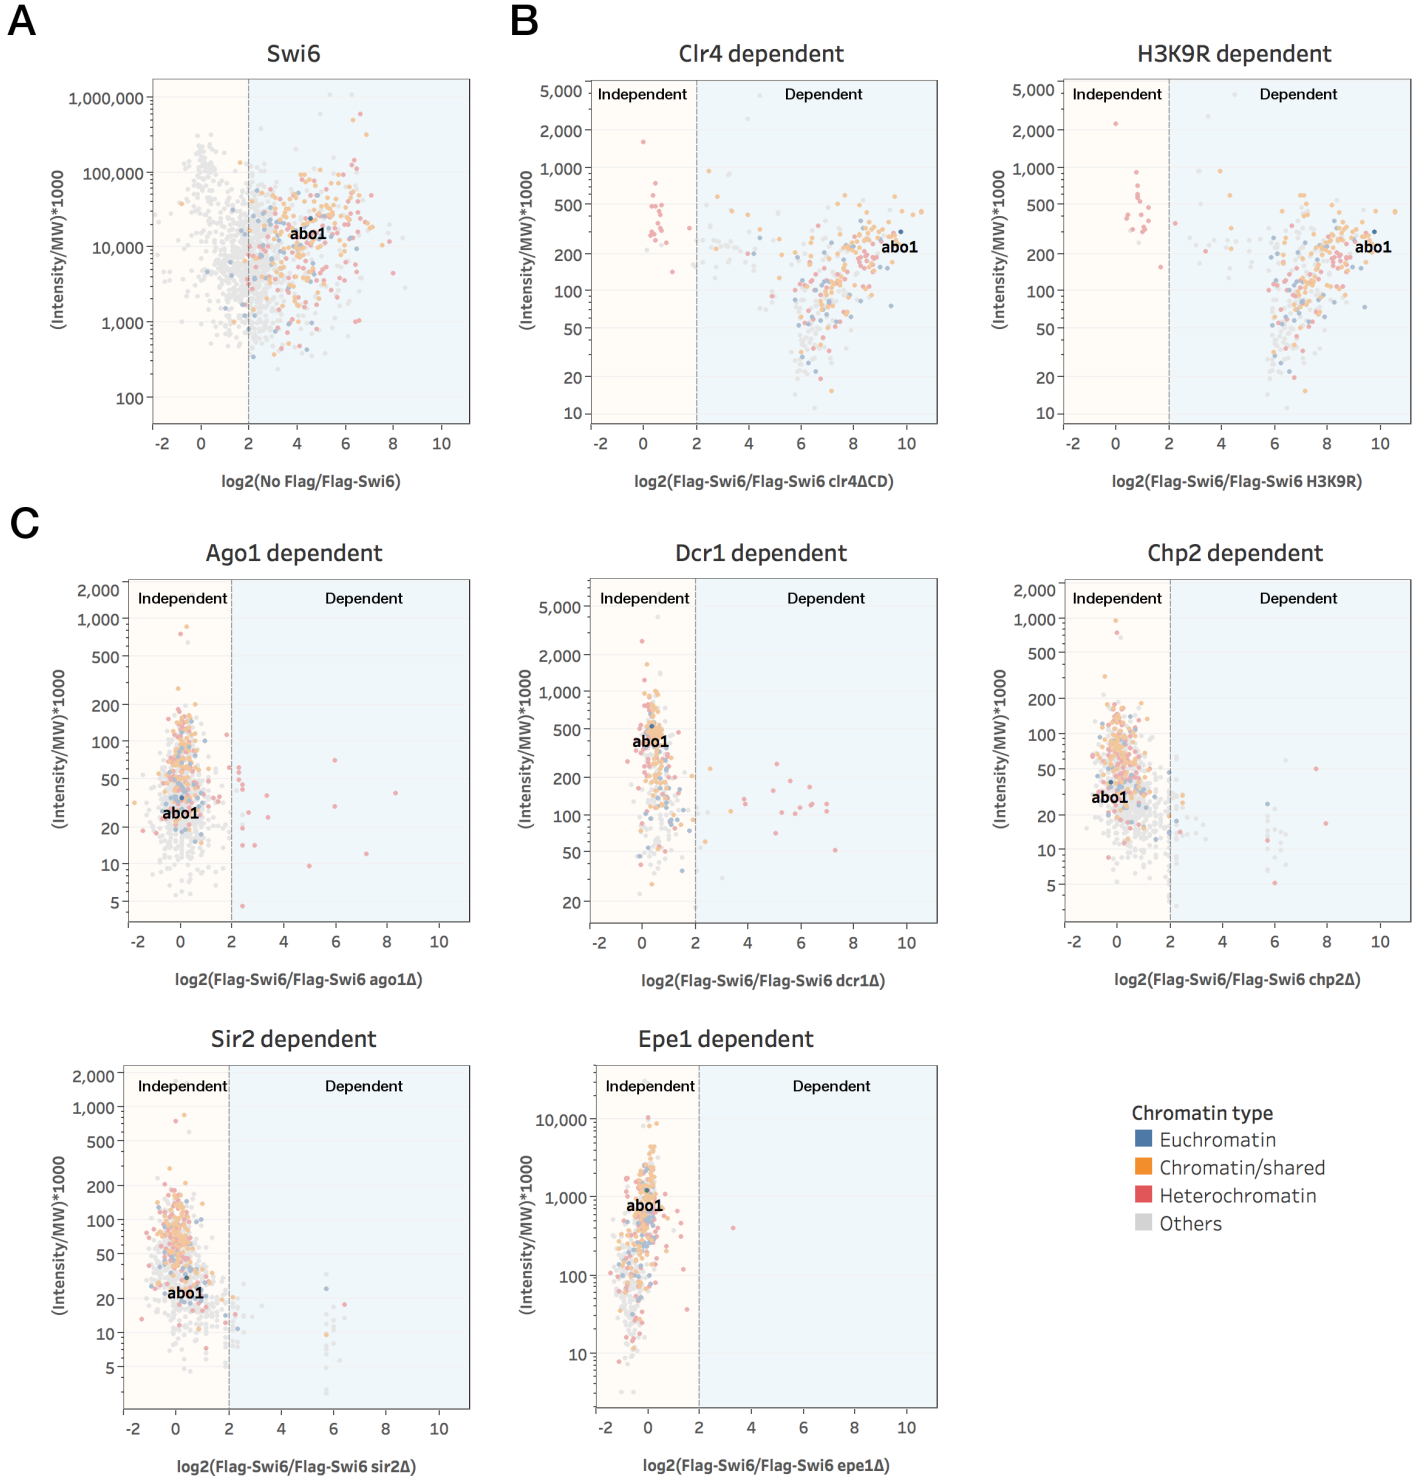

Supplement: 41598_2020_63209_MOESM1_ESM.pdf [file 41598_2020_63209_MOESM1_ESM.pdf]
