# Supplementary material for: Abo1 is required for the H3K9me2 to H3K9me3 transition in heterochromatin
Source: PubMed Central journal article supplement (PMC7142091; doi:10.1038/s41598-020-63209-y), 2020-04-08
Supplement: 41598_2020_63209_MOESM2_ESM.pdf [file 41598_2020_63209_MOESM2_ESM.pdf]

## Supplementary information file

### **Abo1 is required for the H3K9me2 to H3K9me3 transition in heterochromatin**

Wenbo Dong<sup>1</sup>, Eriko Oya<sup>1</sup>, Yasaman Zahedi<sup>1</sup>, Punit Prasad<sup>1,2</sup>, J Peter Svensson<sup>1</sup>,  
Andreas Lennartsson<sup>1</sup>, Karl Ekwall<sup>1</sup>, Mickaël Durand-Dubief<sup>1,\*</sup>.

<sup>1</sup>Dept of Biosciences and Nutrition, Karolinska Institutet NEO, 141 83 Huddinge, Sweden

<sup>2</sup>Institute of Life Sciences, NALCO Square, *Bhubaneswar*, 751023 Odhisa, India

\*Corresponding author :

mickael.durand-dubief@ki.se

**Supplementary Table S1** The top 30 chromatin-involved genes having negative interactions *with* *abo1*. The score represents the strength of the negative genetic interaction. The right column represents the average standard deviation for triplicate experiments.

**Supplementary Table S2** Strain table.

**Supplementary Table S3** Primer table.

**Supplementary Figure S1** H3K9me2, H3K9me3 enrichment and RNA expression at subtelomeric regions in the *abo1* $\Delta$  and wild-type strains. H3K9me2 enrichment (upper panel), H3K9me3 enrichment (middle panel) and expression (lower panel) in log<sub>2</sub> at 30°C in the specified left and right subtelomere regions of all three chromosomes. P-values were calculated using a two-tailed unpaired t-test. N.S., not significant (p>0.1), \*p<0.1, \*\*p<0.05, \*\*\*p<0.01.

**Supplementary Figure S2** H3K9me2 enrichment, H3K9me3 enrichment and RNA expression at different regions of the centromeres for the three chromosomes in the *abo1* $\Delta$  and wild-type strains. H3K9me2 enrichment (upper panel), H3K9me3 enrichment (middle panel) and expression (lower panel) in log<sub>2</sub> at 30°C in the specified left and right subtelomere regions of all three chromosomes. The specified regions were labelled on the X-axis. P-values were calculated using a two-tailed unpaired t-test. N.S., not significant (p>0.1), \*p<0.1, \*\*p<0.05, \*\*\*p<0.01.

**Supplementary Figure S3** RNA expression in wild-type and *abo1* $\Delta$  strains at 25°C, 30°C, and 37°C. **(A)** Domainogramm with RNA expression represented as log<sub>2</sub> values from blue (low expression) to red (high expression). **(B)** Box plots of RNA expression at different regions of the subtelomeres for the three chromosomes of the *abo1* $\Delta$  and wild-type strains. The X-axis indicates the distance from the chromosome ends. **(C)** Box plots of RNA expression at different regions of the centromeres for the three chromosomes of the *abo1* $\Delta$  and wild-type strains. The X-axis indicates the distance from the chromosome ends. P-values were calculated using a two-tailed unpaired t-test compared to the wild-type strain grown at the same temperature. N.S., not significant (p>0.1), \*p<0.1, \*\*p<0.05, \*\*\*p<0.01.

**Supplementary Figure S4** Relative enrichment of H3K9me2 in wild-type, *sir2* $\Delta$ , *dcr1* $\Delta$ , *epe1* $\Delta$ , and nitrogen-starved wild-type strains at subtelomeric regions. Data were collected from previous work [1]. The X-axis represents the distance from the chromosome ends. Boxes of different colours indicate different samples as noted. P-

values were calculated using a two-tailed unpaired t-test compared to the wild-type. N.S., not significant ( $p>0.1$ ), \* $p<0.1$ , \*\* $p<0.05$ , \*\*\* $p<0.01$ .

**Supplementary Figure S5** Relative enrichment of H3K9me2 in wild-type and *taz1Δ* strains at subtelomeric regions. Data were collected from previous work [2]. The X-axis represents the distance from the chromosome ends. P-values were calculated using a two-tailed unpaired t-test relative to the wild-type. N.S., not significant ( $p>0.1$ ), \* $p<0.1$ , \*\* $p<0.05$ , \*\*\* $p<0.01$ .

**Supplementary Figure S6** Relative enrichment of H3K9me2 at chromosome ends in wild-type, *clr4<sup>W31G</sup>*, *clr4<sup>I418P</sup>*, and *clr4<sup>F449Y</sup>* strains. Each strain is indicated by the noted colour. The H3K9me2 ChIP data were extracted from published data [3]. P-values were calculated using a two-tailed unpaired t-test compared to the wild-type. N.S., not significant ( $p>0.1$ ), \* $p<0.1$ , \*\* $p<0.05$ , \*\*\* $p<0.01$ .

**Supplementary Figure S7** Relative enrichment of H3K9me2 at the centromeres of three chromosomes in wild-type, *clr4<sup>W31G</sup>*, *clr4<sup>I418P</sup>* and *clr4<sup>F449Y</sup>* strains. Specified regions are labelled in the X-axis. The H3K9me2 ChIP data was extracted from published article [3]. p-values were calculated using a two-tailed unpaired t-test compared to the wild-type) N.S. (not significant)  $>0.1$ , \* $<0.1$ ; \*\* $<0.05$ , \*\*\* $<0.01$ .

**Supplementary Figure S8** H3K9me2 enrichment of heterochromatin islands in *abo1Δ*, *sir2Δ*, *dcr1Δ*, *epe1Δ*, and nitrogen-starved wild-type strains and H3K9me2 and H3K9me3 enrichment in *clr4<sup>I418P</sup>*, *clr4<sup>F449Y</sup>*, and *clr4<sup>W31G</sup>* strains. **(A)** H3K9me2 enrichment ratio in heterochromatin islands in *abo1Δ*, *sir2Δ*, *dcr1Δ*, *epe1Δ*, and nitrogen-starved wild-type strains compared to wild-type. The log<sub>2</sub> values for H3K9me2 enrichment signals of DSR and non-DSR islands were extracted from the published data [1,2]. **(B)** H3K9me2 and H3K9me3 enrichment ratio of *clr4<sup>I418P</sup>*, *clr4<sup>F449Y</sup>*, and *clr4<sup>W31G</sup>* strains compared to wild-type. The log<sub>2</sub> values for H3K9me2 enrichment signals of DSR and non-DSR islands were extracted from the published article [3] (GEO accession: GSE83495).

**Supplementary Figure S9** Normalised cumulative nucleosome position frequency of wild-type and *abo1Δ* using low and high MNase of the qPCR targets. Data were obtained from Gal et al. [4] (GEO accession: GSE67410). **(A)** Subtelomeric targets. **(B)** Pericentromeric targets. **(C)** Non-DSR islands. Yellow boxes represent the regions measured by qPCR in this study. The Y-axes of the plots describe the nucleosome mid-point position frequency distributions.

**Supplementary Figure S10** Histone H3 measured by ChIP-qPCR for WT, *abo1* $\Delta$ , *clr4*<sup>W31G</sup>, and *abo1* $\Delta$ *clr4*<sup>W31G</sup> cells. (A) H3 ChIP-qPCR occupancy of four genes located in the indicated subtelomeric regions. (B) H3 ChIP-qPCR occupancy of four genes located in pericentromeric regions and the Tel1L (*tlh1*) region. (C) H3 ChIP-qPCR occupancy of four different heterochromatin DSR islands: Island6 (*ssm4*), Island8 (*mcp5*), Island9 (*mei4*), and Island16 (*pvg4*). All qPCR experiments were performed in at least two independent biological experiments. Error bars indicate standard error of the mean. \**p*< 0.1, \*\**p*<0.05, \*\*\**p*<0.001, two-tailed unpaired t-test. N.S., not significant (i.e. *p*>0.1).

**Supplementary Figure S11** Proteins identified in Abo1-TAP. Wild-type (Mock) and *abo1*-TAP extracts were purified and analysed using mass spectrometry. The left column indicates the number of unique peptides detected.

**Supplementary Figure S12** Proteins recovered from Flag-Swi6 nChIP purification in wild-type compared to no-FLAG background or Flag-Swi6 in a mutant background. Data were extracted from Iglesias et al. [5]. Y-axis represents the protein abundance (total peptide intensity divided by molecular weight [MW] multiplied by a 1,000) in logarithmic scale. X-axis represents the log<sub>2</sub> ratio value of Flag-Swi6 wild-type versus no Flag or Flag-Swi6 mutation background IP. Major FLAG-Swi6 pulled-down protein groups relevant are color coded using the criteria defined in the same study [5] and *abo1* protein name is denoted. Vertical dashed black lines mark an enrichment of 4-fold compared to the reference.

## References :

1. Zofall M, Yamanaka S, Reyes-Turcu FE, Zhang K, Rubin C, Grewal SIS (2012) RNA Elimination Machinery Targeting Meiotic mRNAs Promotes Facultative Heterochromatin Formation. *Science* **335**: 96-100.
2. Zofall M, Smith DR, Mizuguchi T, Dhakshnamoorthy J, Grewal SIS (2016) Taz1-Shelterin Promotes Facultative Heterochromatin Assembly at Chromosome-Internal Sites Containing Late Replication Origins. *Mol Cell* **62**: 862-874.
3. Jih G, Iglesias N, Currie MA, Bhanu NV, Paulo JA, Gygi SP, Garcia BA, Moazed D (2017) Unique roles for histone H3K9me states in RNAi and heritable silencing of transcription. *Nature* **547**: 463.
4. Gal C, Murton HE, Subramanian L, Whale AJ, Moore KM, Paszkiewicz K, Codlin S, Bähler J, Creamer KM, Partridge JF, Allshire RC, Kent NA, Whitehall SK (2016) Abo1, a conserved bromodomain AAA-ATPase, maintains global nucleosome occupancy and organisation. *Embo Rep* **17**, 79-93.
5. Iglesias N, Paulo JA, Tatarakis A, Wang X, Edwards AL, Bhanu NV, Garcia BA, Haas W, Gygi SP, Moazed D. (2019) Native Chromatin Proteomics Reveals a Role for Specific Nucleoporins in Heterochromatin Organization and Maintenance. *Mol Cell* **77** 1–16,
